# Supplementary material
Source: PubMed Central journal article supplement (PMC3086132)
Supplement: NIHMS286999-supplement-Supp_Fig_S1-S3.pdf [file NIHMS286999-supplement-Supp_Fig_S1-S3.pdf]

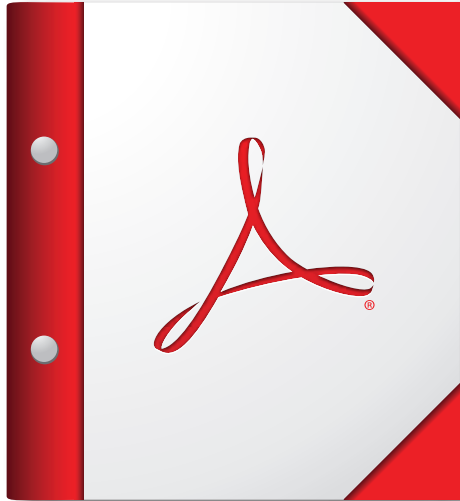

**For the best experience, open this PDF portfolio in  
Acrobat 9 or Adobe Reader 9, or later.**

[Get Adobe Reader Now!](#)
